# Supplementary figures and images for: Prediction of activity coefficients by similarity-based imputation using quantum-chemical descriptors
Source: Royal Society of Chemistry journal article supplement (doi:10.1039/d4cp04341c), 2025-01-01

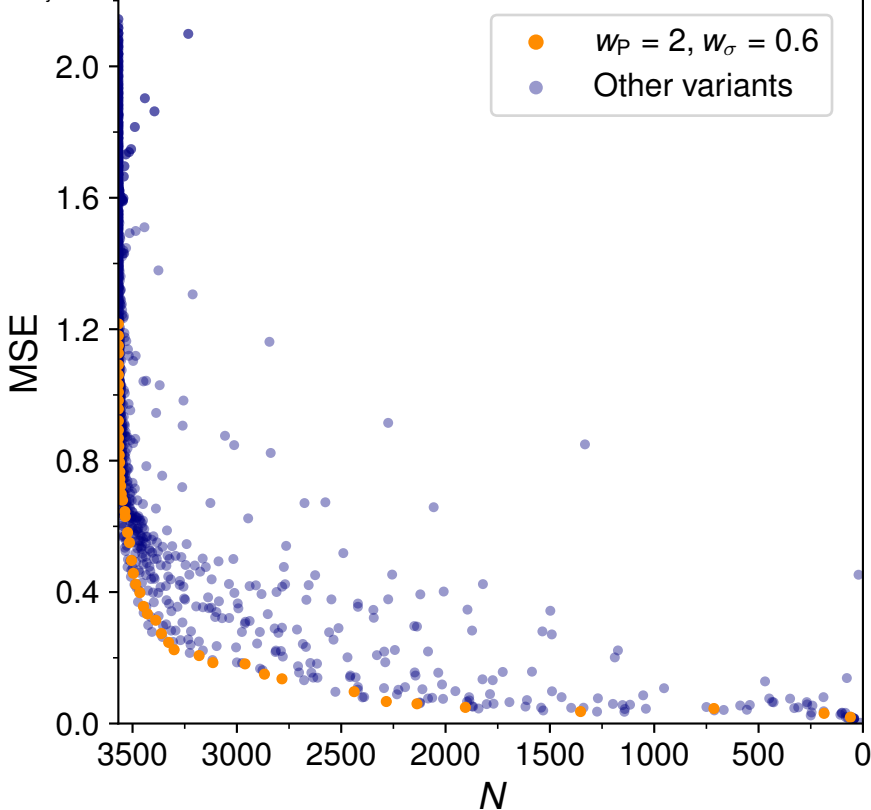

Supplement: d4cp04341c2.pdf [file d4cp04341c2.pdf]

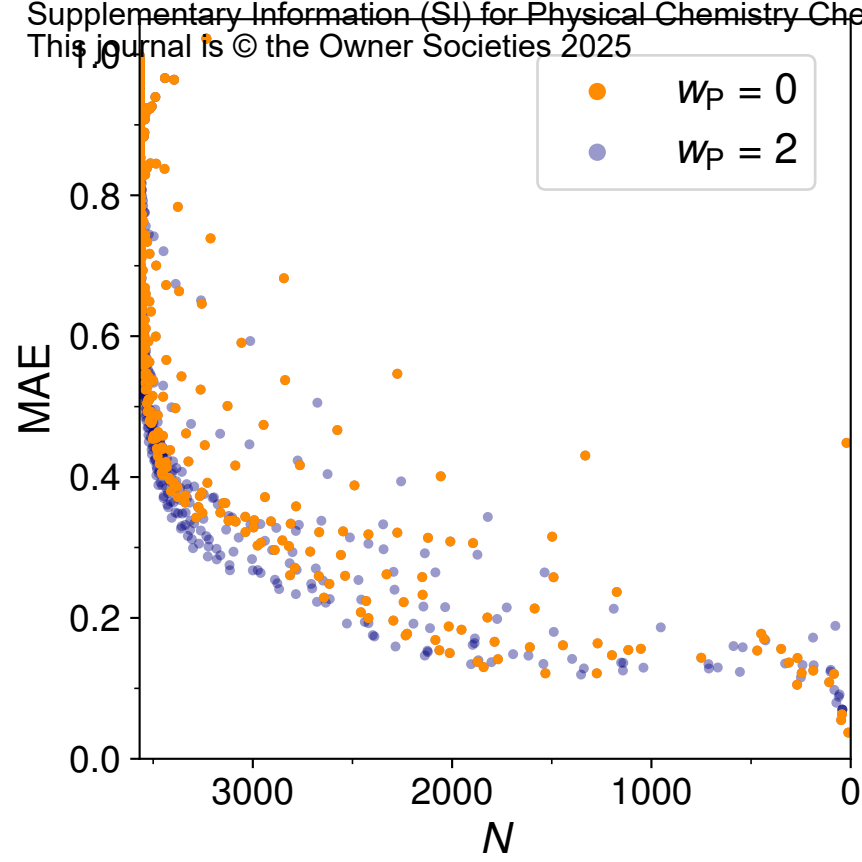

(a)

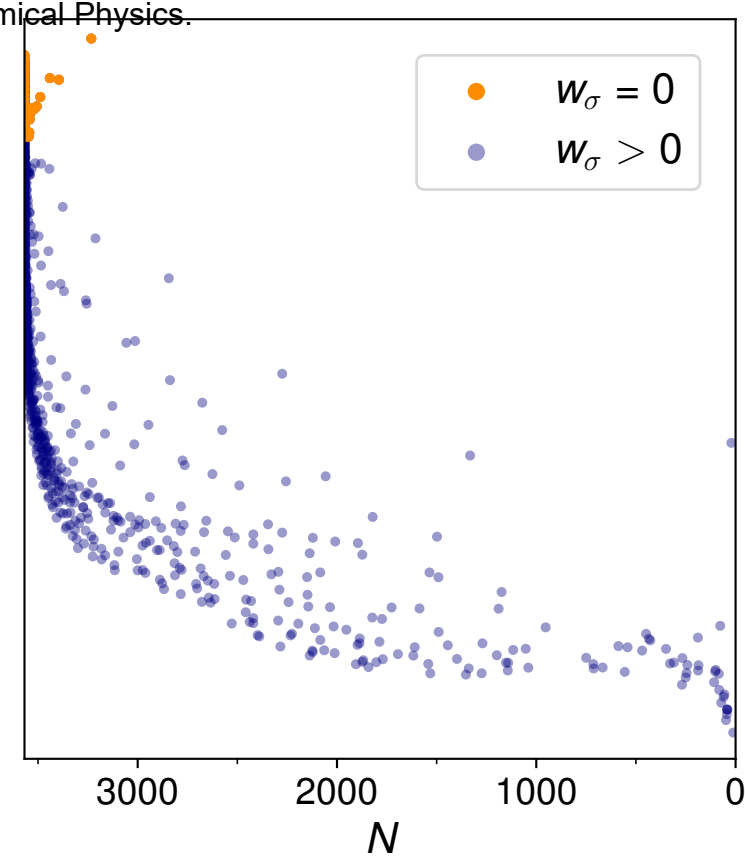

(b)

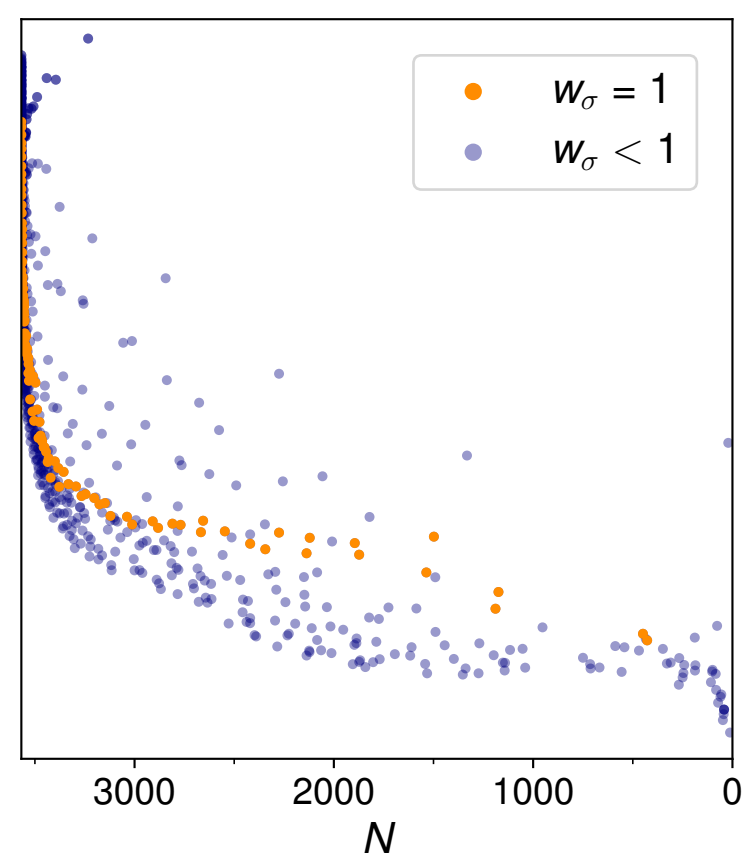

(c)

Supplement: d4cp04341c3.pdf [file d4cp04341c3.pdf]

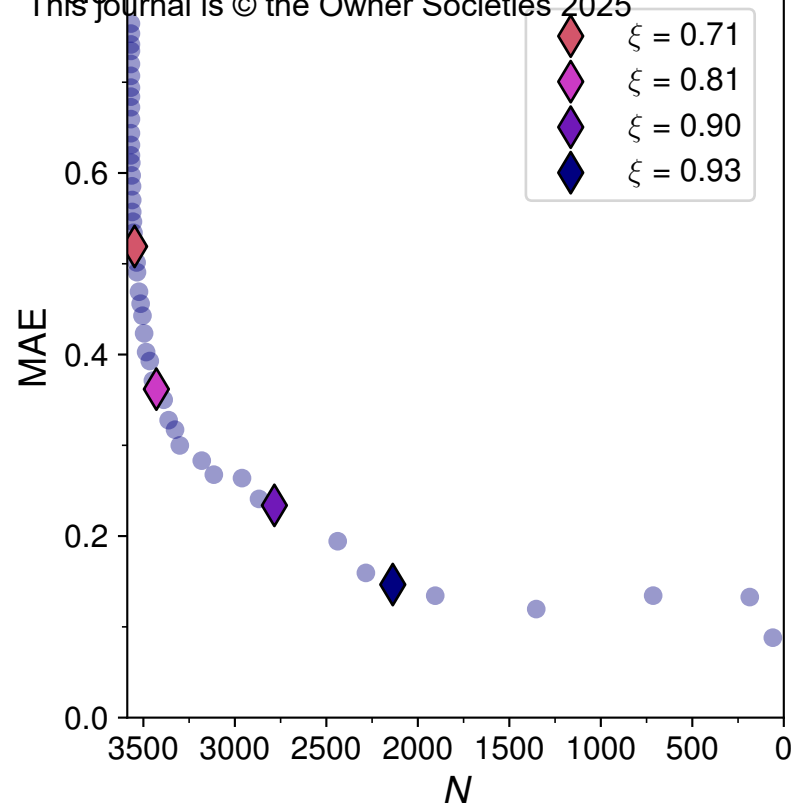

(a)

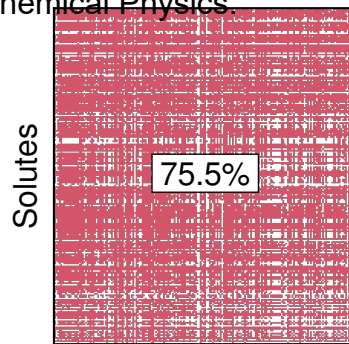

Solvents

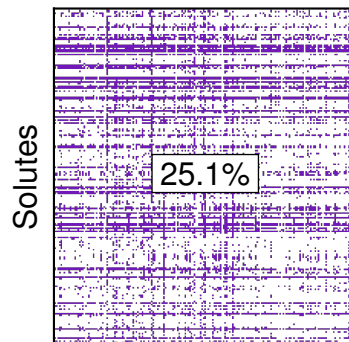

Solvents

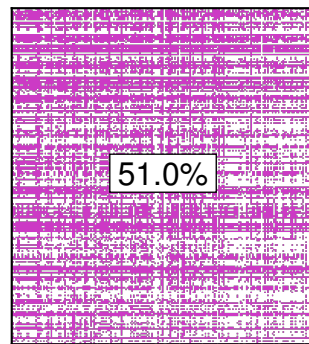

Solvents

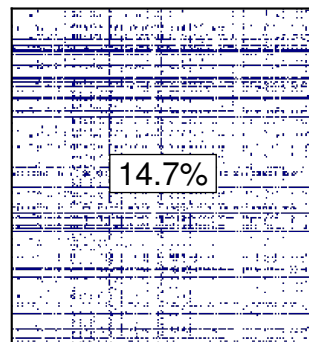

Solvents

(b)

Supplement: d4cp04341c4.pdf [file d4cp04341c4.pdf]

(a) SBM ( $r = 0.93$ )

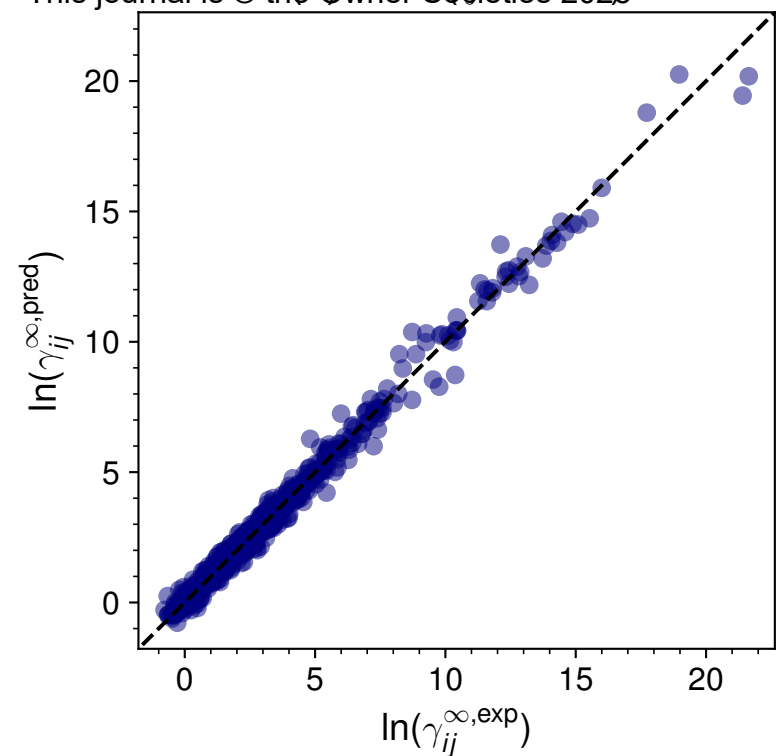

(b) Mod. UNIFAC (Do)

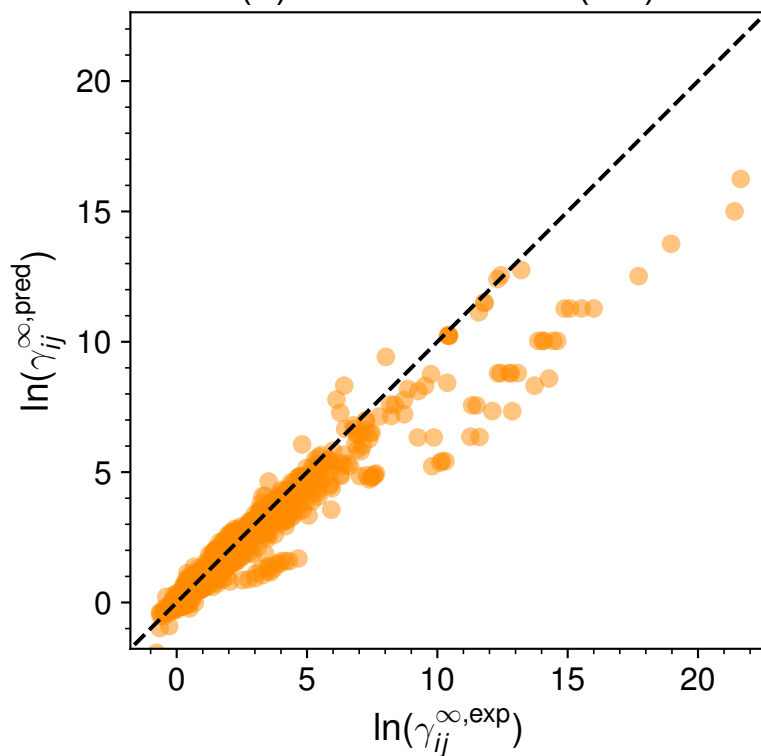

(c) COSMO-SAC

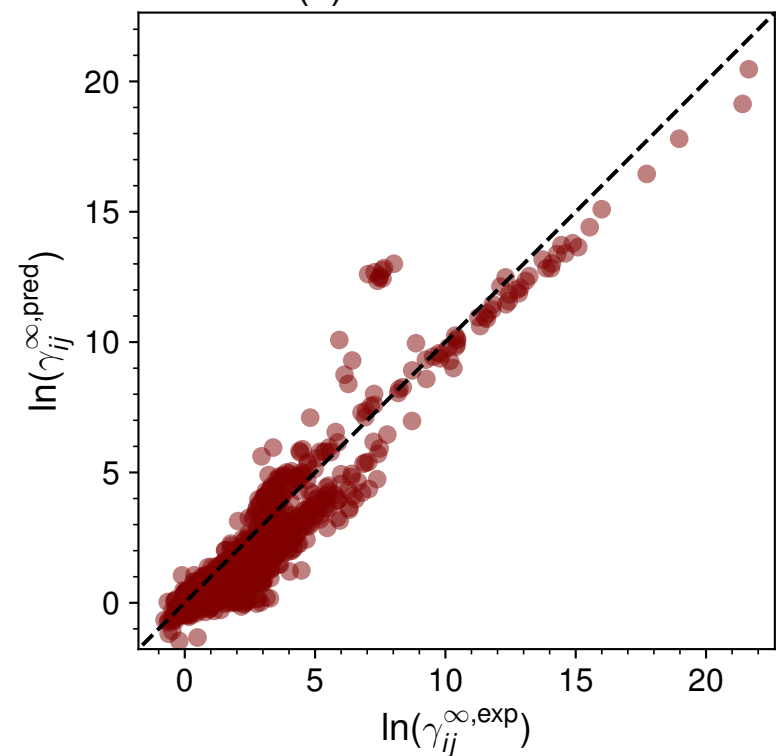

(d) COSMO-SAC-dsp

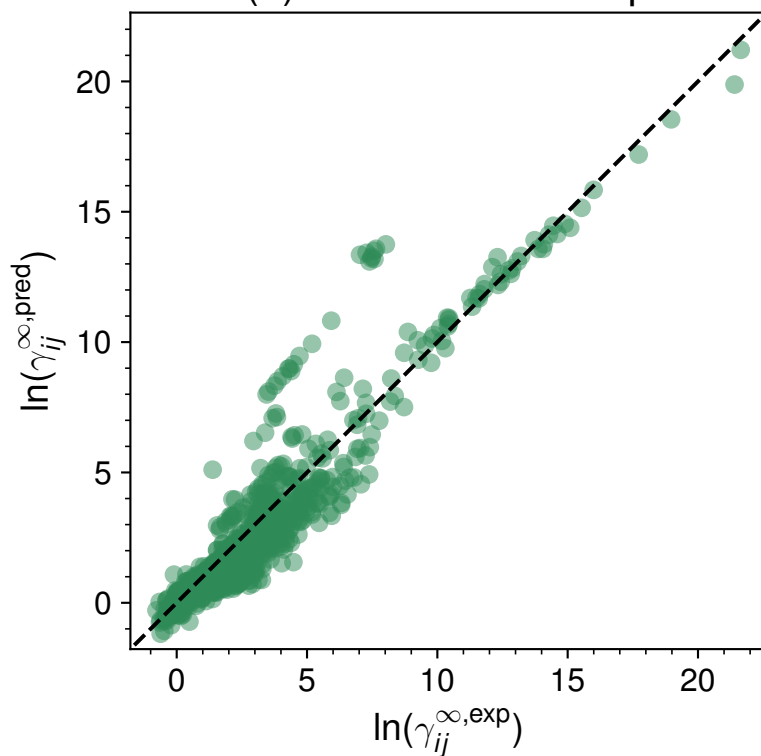

Supplement: d4cp04341c5.pdf [file d4cp04341c5.pdf]
